# Supplementary material
Source: PubMed Central journal article supplement (PMC6951812)
Supplement: NIHMS1545262-supplement-1.pdf [file NIHMS1545262-supplement-1.pdf]

| Variable                                                                                   | Univariate analysis* |                  |                  |
|--------------------------------------------------------------------------------------------|----------------------|------------------|------------------|
|                                                                                            | Coefficient          | Standard Error   | P value          |
| <b>Demographics</b>                                                                        |                      |                  |                  |
| Age at time of CAR-T therapy                                                               | -0.32                | 0.09             | 0.001            |
| Sex (male vs female)                                                                       | -1.96                | 2.60             | 0.46             |
| Race (white vs other)                                                                      | 2.84                 | 3.29             | 0.39             |
| Marital status<br>(non-married vs married)                                                 | 3.76                 | 2.96             | 0.21             |
| Employment status<br>(not working, but not due to health vs working)                       | -6.42                | 2.93             | 0.04             |
| Employment status<br>(unable to work due to health issues vs working)                      | -2.10                | 2.87             | 0.47             |
| <b>Medical Factors</b>                                                                     |                      |                  |                  |
| Diagnosis (CLL vs ALL)                                                                     | -3.86                | 3.11             | 0.22             |
| Diagnosis (NHL vs ALL)                                                                     | -0.20                | 3.14             | 0.95             |
| # of Prior lines of therapy                                                                | 0.12 <b>0.26</b>     | 0.65 <b>0.67</b> | 0.86 <b>0.70</b> |
| CNS disease involvement (yes vs no)                                                        | -0.83 <b>0.62</b>    | 3.84 <b>3.73</b> | 0.83 <b>0.87</b> |
| <b>CNS directed chemotherapy before CAR-T<br/>(yes vs no)</b>                              | <b>2.25</b>          | <b>2.99</b>      | <b>0.46</b>      |
| CRS (2-4 vs 0-1)                                                                           | 3.03                 | 2.50             | 0.23             |
| Neurotoxicity<br>(2-4 vs 0-1)                                                              | 1.81                 | 2.60             | 0.49             |
| <b>Allo HCT before CAR-T (versus no Allo HCT<br/>at any time)</b>                          | <b>1.64</b>          | <b>3.13</b>      | <b>0.60</b>      |
| <b>Allo HCT after CAR-T (versus no Allo HCT at<br/>any time)</b>                           | <b>4.42</b>          | <b>3.01</b>      | <b>0.15</b>      |
| Remission status<br>(remission vs not in remission as time of<br>questionnaire completion) | -0.90                | 3.41             | 0.79             |
| Assessment year after CAR-T cells                                                          | 0.92                 | 1.29             | 0.48             |
| <b>Psychiatric Problems before CAR-T (yes<br/>vs no)</b>                                   |                      |                  |                  |

|                        |      |      |       |
|------------------------|------|------|-------|
| Depression             | 1.03 | 2.87 | 0.72  |
| Anxiety <sup>†</sup>   | 9.21 | 2.49 | 0.001 |
| Insomnia               | 0.83 | 2.89 | 0.78  |
| Substance Use Disorder | 2.70 | 5.44 | 0.62  |
|                        |      |      |       |

659 \* Adjusted for anxiety prior to CAR-T therapy

660 † Not adjusted for anxiety prior to CAR-T therapy

661

662

663 **Supplemental Table 2. Regression Analysis for Risk Factor for PROMIS depression Score**

| Variable                                                              | Univariate analysis* |                  |                  |
|-----------------------------------------------------------------------|----------------------|------------------|------------------|
|                                                                       | Coefficient          | Standard Error   | P value          |
| <b>Demographics</b>                                                   |                      |                  |                  |
| Age at time of CAR-T therapy                                          | -0.30                | 0.10             | 0.01             |
| Sex (male vs female)                                                  | -0.95                | 3.12             | 0.76             |
| Race (white vs other)                                                 | 0.14                 | 3.43             | 0.97             |
| Marital status<br>(non-married vs married)                            | -1.25                | 3.16             | 0.69             |
| Employment status<br>(not working, but not due to health vs working)  | -2.54                | 3.21             | 0.43             |
| Employment status<br>(unable to work due to health issues vs working) | -2.35                | 3.26             | 0.48             |
| <b>Medical Factors</b>                                                |                      |                  |                  |
| Diagnosis (CLL vs ALL)                                                | -6.40                | 3.17             | 0.05             |
| Diagnosis (NHL vs ALL)                                                | -0.78                | 3.17             | 0.81             |
| # of Prior lines of therapy                                           | 0.93 <b>1.12</b>     | 0.71 <b>0.72</b> | 0.20 <b>0.13</b> |
| CNS disease involvement (yes vs no)                                   | 1.31 <b>1.42</b>     | 3.74 <b>3.70</b> | 0.73 <b>0.70</b> |
| <b>CNS directed chemotherapy before CAR-T (yes vs no)</b>             | <b>2.29</b>          | <b>2.71</b>      | <b>0.40</b>      |
| CRS<br>(2-4 vs 0-1)                                                   | 1.63                 | 2.61             | 0.53             |
| Neurotoxicity<br>(2-4 vs 0-1)                                         | -1.02                | 2.74             | 0.71             |
| <b>Allo HCT before CAR-T (versus no Allo HCT at any time)</b>         | <b>1.64</b>          | <b>3.13</b>      | <b>0.60</b>      |

|                                                                                         |       |      |      |
|-----------------------------------------------------------------------------------------|-------|------|------|
| Allo HCT after CAR-T (versus no Allo HCT at any time)                                   | 4.42  | 3.01 | 0.15 |
| Remission status<br>(remission vs not in remission at time of questionnaire completion) | -6.53 | 3.43 | 0.06 |
| Assessment year after CAR-T cells                                                       | 0.71  | 1.17 | 0.55 |
| <b>Psychiatric Problems before CAR-T (yes vs no)</b>                                    |       |      |      |
| Depression <sup>†</sup>                                                                 | 1.48  | 2.80 | 0.60 |
| Anxiety                                                                                 | 4.64  | 2.67 | 0.09 |
| Insomnia                                                                                | -0.21 | 2.65 | 0.94 |
| Substance Use Disorder                                                                  | -2.91 | 4.92 | 0.56 |

664 \* Adjusted for depression prior to CAR-T therapy

665 † Not adjusted for depression prior to CAR-T therapy

666

667

668  
669  
670

**Supplemental Table 3. Regression Analysis for Risk Factor for PROMIS Global Physical Score**

| Variable                                                                                | Univariate                    |                             |                             |
|-----------------------------------------------------------------------------------------|-------------------------------|-----------------------------|-----------------------------|
|                                                                                         | Coefficient                   | Standard Error              | P value                     |
| <b>Demographics</b>                                                                     |                               |                             |                             |
| Age at time of CAR-T therapy                                                            | 0.14                          | 0.12                        | 0.24                        |
| Sex (male vs female)                                                                    | 1.04                          | 2.97                        | 0.61                        |
| Race (white vs other)                                                                   | 0.79                          | 3.79                        | 0.91                        |
| Marital status<br>(non-married vs married)                                              | -4.09                         | 3.38                        | 0.17                        |
| Employment status<br>(not working, but not due to health vs working)                    | 2.04                          | 2.91                        | 0.35                        |
| Employment status<br>(unable to work due to health issues vs working)                   | -10.29                        | 2.83                        | 0.001                       |
| <b>Medical Factors</b>                                                                  |                               |                             |                             |
| Diagnosis (CLL vs ALL)                                                                  | 5.94                          | 3.50                        | 0.09                        |
| Diagnosis (NHL vs ALL)                                                                  | 1.34                          | 3.56                        | 0.78                        |
| # of Prior lines of therapy                                                             | <del>0.66</del> <b>0.77</b>   | <del>0.75</del> <b>0.89</b> | <del>0.33</del> <b>0.39</b> |
| CNS disease involvement (yes vs no)                                                     | <del>-5.02</del> <b>-6.35</b> | <del>4.00</del> <b>4.57</b> | <del>0.18</del> <b>0.17</b> |
| <b>CNS directed chemotherapy before CAR-T (yes vs no)</b>                               | <b>-3.09</b>                  | <b>3.47</b>                 | <b>0.38</b>                 |
| CRS<br>(2-4 vs 0-1)                                                                     | -4.21                         | 2.81                        | 0.09                        |
| Neurotoxicity<br>(2-4 vs 0-1)                                                           | -2.10                         | 3.00                        | 0.28                        |
| <b>Allo HCT before CAR-T (versus no Allo HCT at any time)</b>                           | <b>-6.88</b>                  | <b>3.92</b>                 | <b>0.09</b>                 |
| <b>Allo HCT after CAR-T (versus no Allo HCT at any time)</b>                            | <b>-6.75</b>                  | <b>3.82</b>                 | <b>0.09</b>                 |
| Remission status<br>(remission vs not in remission at time of questionnaire completion) | -0.11                         | 3.79                        | 0.75                        |
| Assessment year after CAR-T cells                                                       | -1.06                         | 1.28                        | 0.37                        |
| <b>Psychiatric Problems before CAR-T (yes vs no)</b>                                    |                               |                             |                             |

|                        |       |      |      |
|------------------------|-------|------|------|
| Depression             | -2.75 | 3.11 | 0.38 |
| Anxiety                | -2.58 | 2.88 | 0.45 |
| Insomnia               | -1.95 | 2.88 | 0.36 |
| Substance Use Disorder | -1.83 | 5.46 | 0.96 |

671

672

673 **Supplemental Figure 1. PROMIS scores histograms**

674

675

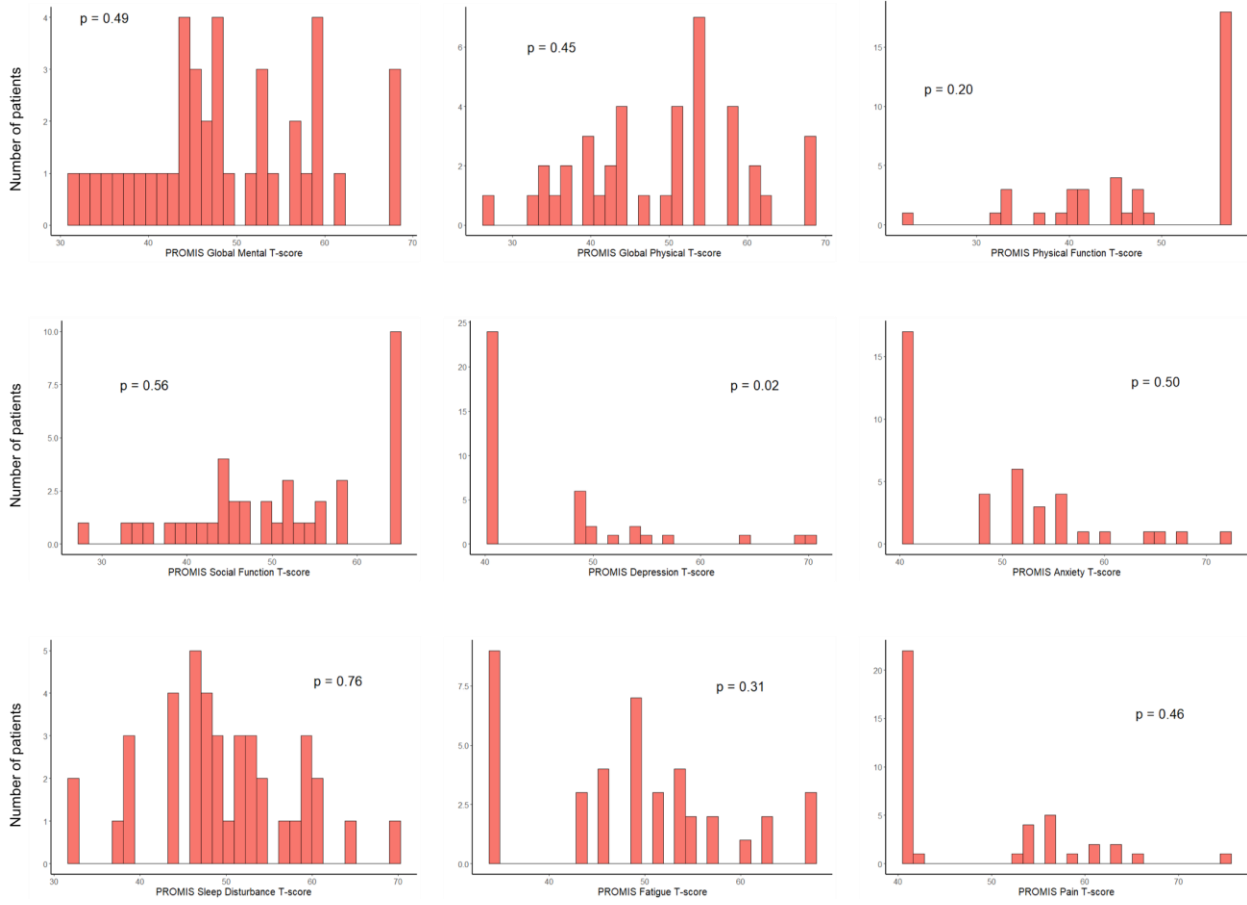

676

677

678

679

680

681

682

683
